# Supplementary material for: Targeting SARS-CoV-2 endoribonuclease: a structure-based virtual screening supported by in vitro analysis
Source: PubMed Central journal article supplement (PMC9349323; doi:10.1038/s41598-022-17573-6), 2022-08-03
Supplement: 41598_2022_17573_MOESM1_ESM.pdf [file 41598_2022_17573_MOESM1_ESM.pdf]

# Supplementary material 1

Probability density of the SMILES string lengths used with DeepPurpose

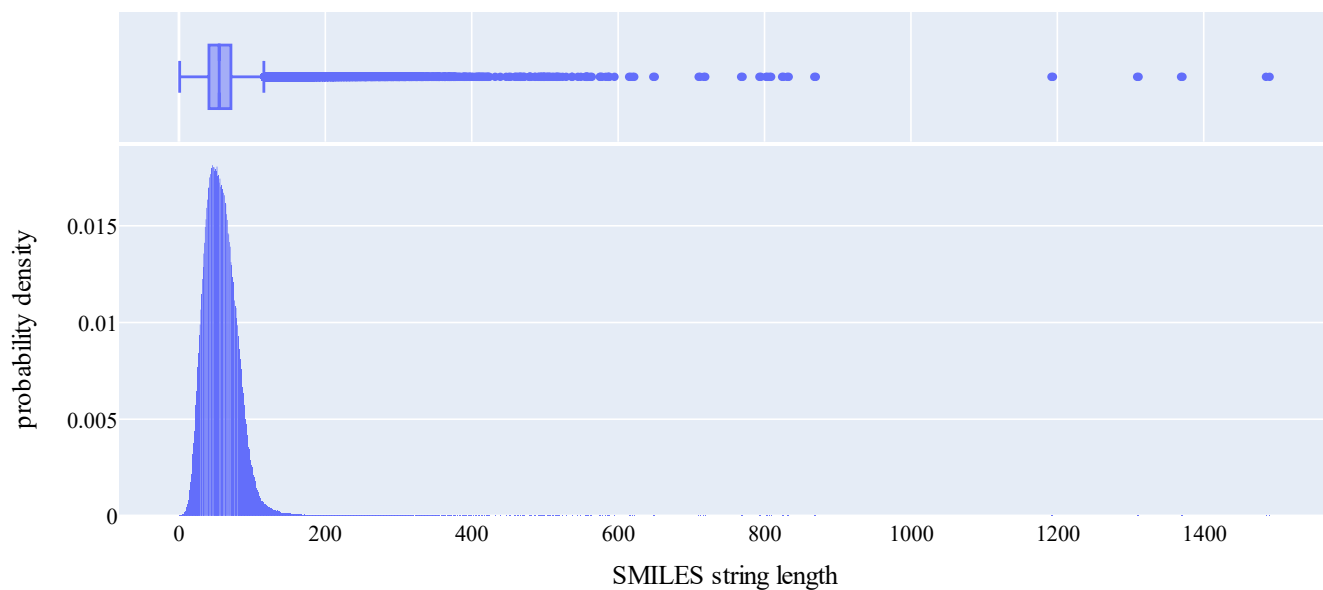

*Supplementary Figure S1* The distribution of the SMILES lengths of compounds used in this study with the DeepPurpose library

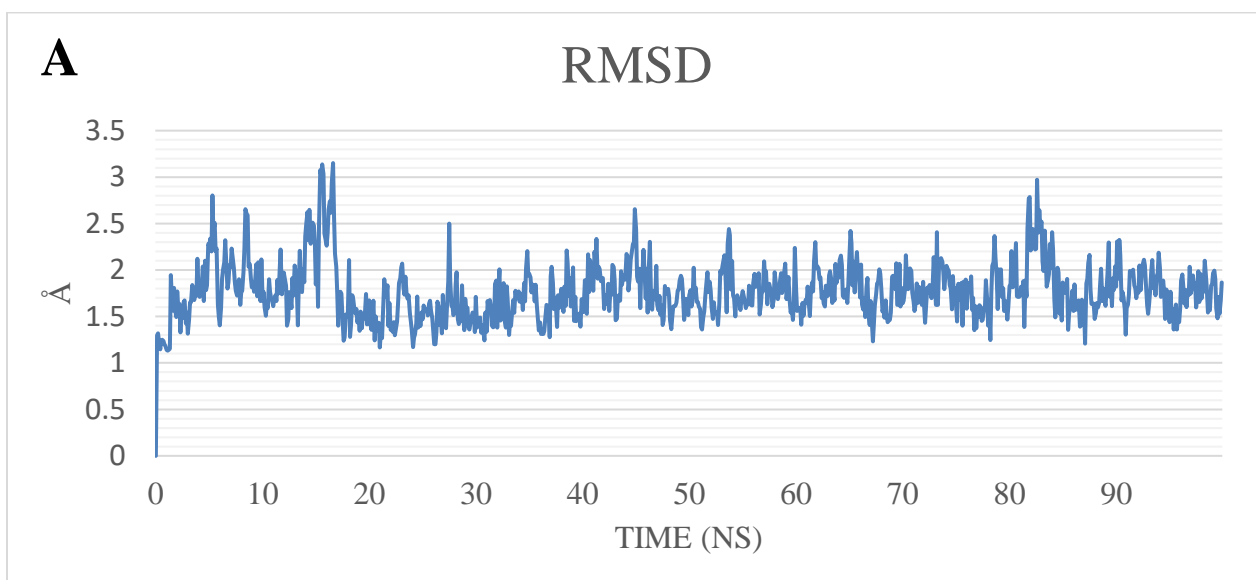

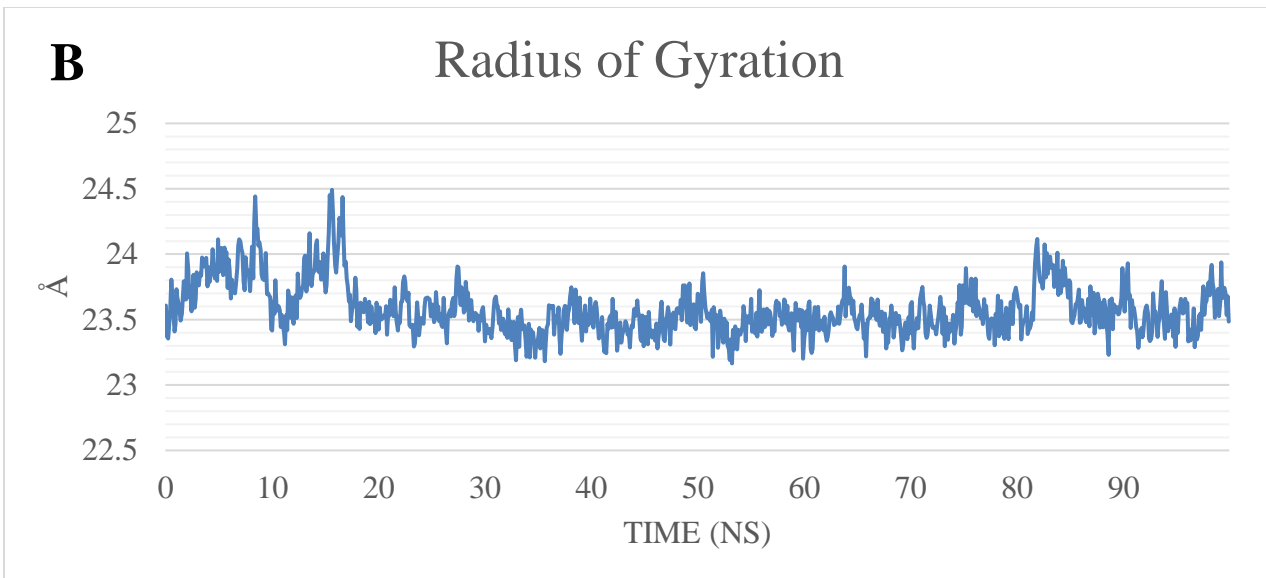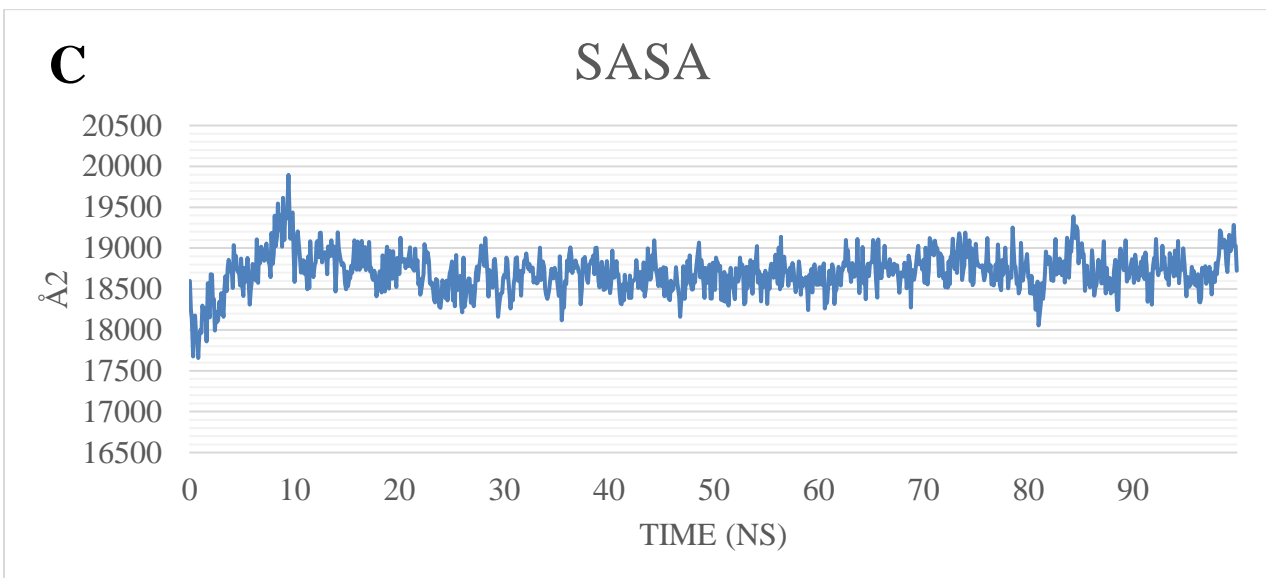

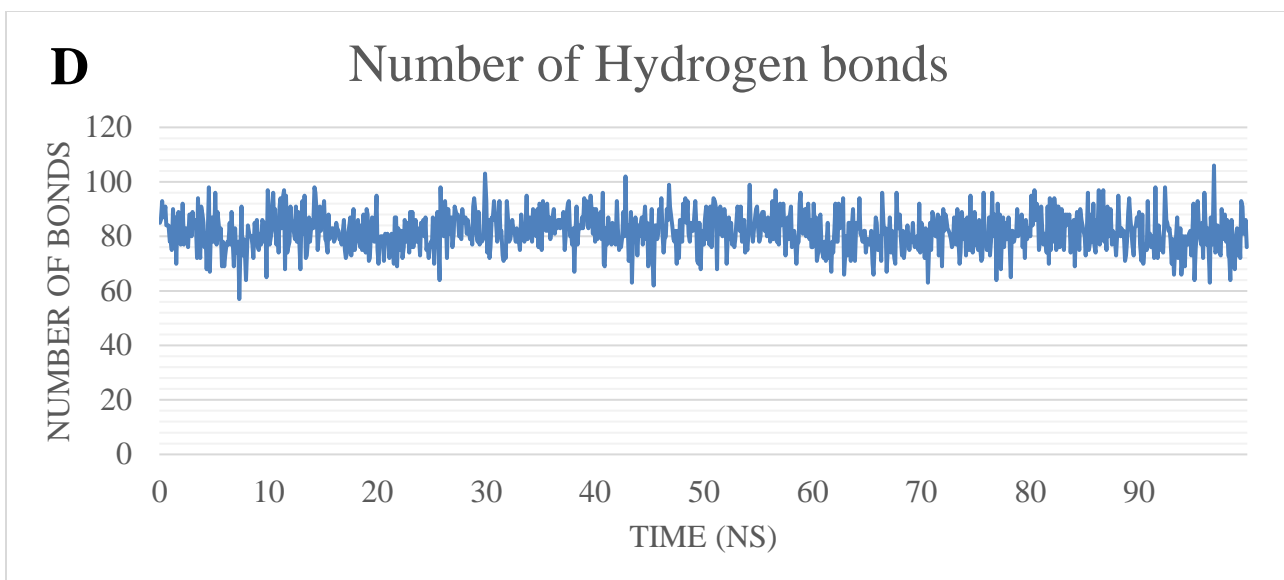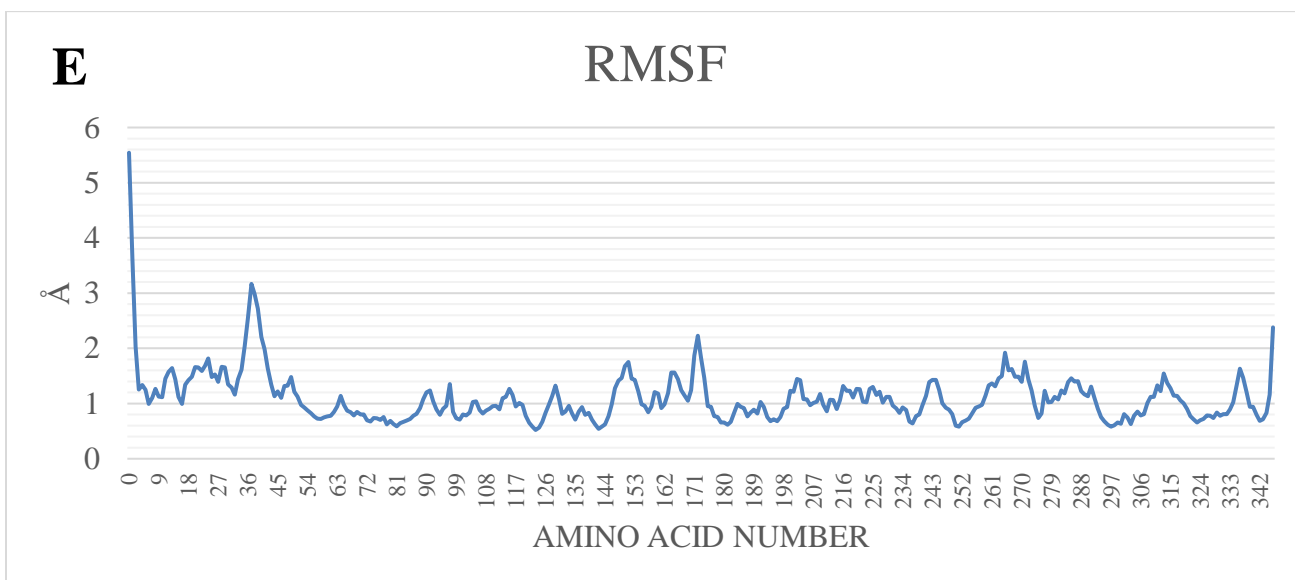

**Supplementary Figure S2** shows the analyses done on the second replicate of the ZINC000104379474-NSP15 complex. A) RMSD shows an average value of 1.76 Å. The values show equilibration after approximately 17 ns. B) radius of gyration shows an average value of 23.58 Å with a similar trend to the RMSD. C) the SASA values show an increase in the first 10 ns before stabilizing at an average of 18710 Å<sup>2</sup>. D) the number of hydrogen bonds shows an average value of 82 bonds. E) the RMSF values show small fluctuations for nearly most of the amino acids except for the N-terminal (reaching 5.5 Å).

Supplementary table S1 PLIP web server analysis for NSP15-ZINC000104379474 complex second replicate.

| CLUSTER NUMBER | NUMBER OF HYDROGEN BONDS | AMINO ACIDS IN RECEPTOR          | NUMBER OF HYDROPHOBIC INTERACTIONS | AMINO ACIDS IN RECEPTOR | NUMBER OF SALT BRIDGES | AMINO ACIDS IN RECEPTOR |
|----------------|--------------------------|----------------------------------|------------------------------------|-------------------------|------------------------|-------------------------|
| C1             | 4                        | H250 - K290 - S294 - T341        | 3                                  | Q245 - V292 - Y343      | 1                      | K290                    |
| C2             | 5                        | G248 - H250 - K290 - S294 - T341 | 2                                  | V292 - Y343             | 2                      | H235 - K290             |

C1

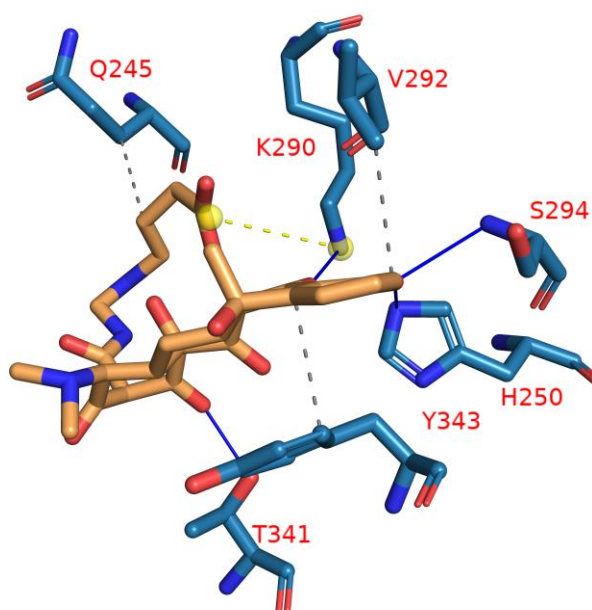

C2

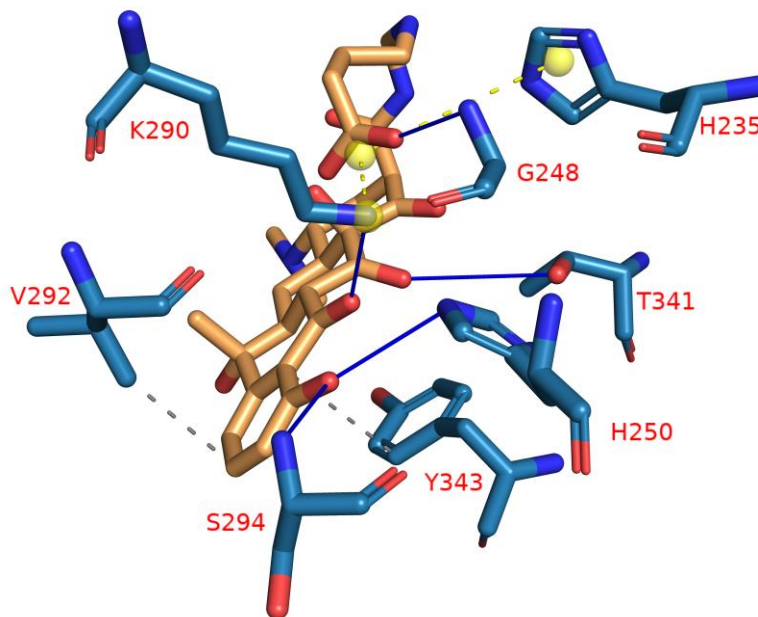

*Supplementary Figure S3* shows the interactions detected using PLIP between ZINC000104379474 and NSP15 for the cluster representatives produced from the NSP15-ZINC000104379474 complex second replicate.

*Supplementary Table S2* shows the different components of MM-GBSA for the NSP15-ZINC000104379474 complex second replicate.

| SYSTEM                         | $\Delta$ VDWAALS  | $\Delta$ EEL        | $\Delta$ EGB       | $\Delta$ ESURF   | $\Delta$ GGAS       | $\Delta$ GSOLV     | $\Delta$ TOTAL    | $-T\Delta$ S     | $\Delta$ G BINDING |
|--------------------------------|-------------------|---------------------|--------------------|------------------|---------------------|--------------------|-------------------|------------------|--------------------|
| NSP15-ZINC000104379474 COMPLEX | $-32.94 \pm 3.69$ | $-204.27 \pm 19.12$ | $215.65 \pm 14.01$ | $-4.61 \pm 0.29$ | $-237.21 \pm 18.04$ | $211.04 \pm 13.94$ | $-26.17 \pm 6.89$ | $17.92 \pm 3.14$ | $-8.25 \pm 7.57$   |

## NSP15-ZINC000104379474 complex binding affinity decomposition

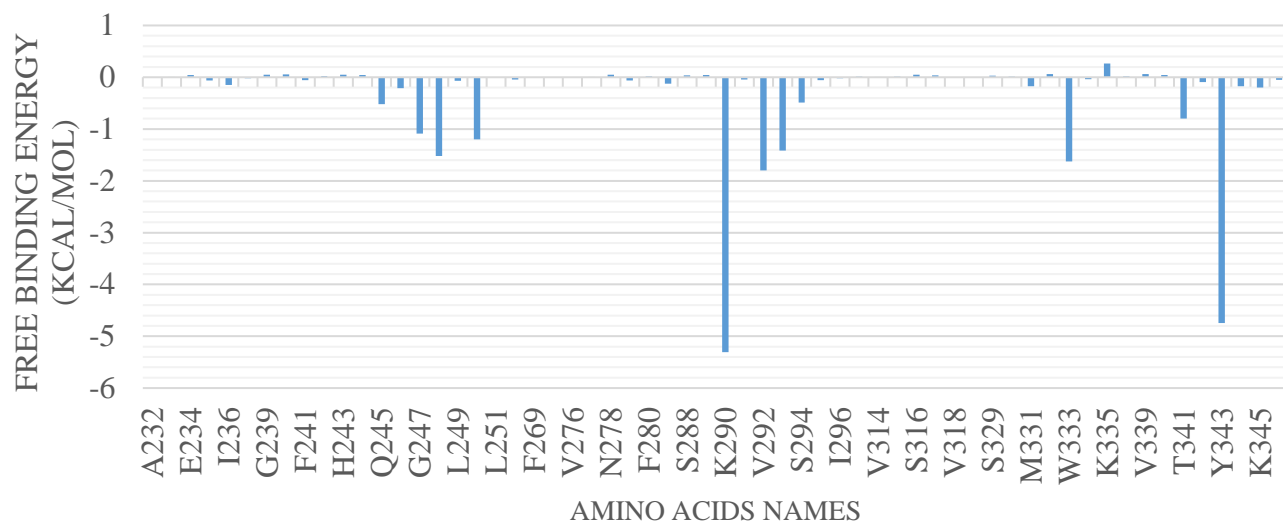

**Supplementary Figure S4** shows the binding free energy decomposition for the NSP15-ZINC000104379474 complex second replicate. Eight amino acids show a contribution of less than -1 Kcal/Mol. G247 (-1.08 Kcal/Mol), G248 (-1.51 Kcal/Mol), H250 (-1.19 Kcal/Mol), K290 (-5.3 Kcal/Mol), V292 (-1.8 Kcal/Mol), C293 (-1.41 Kcal/Mol), W333 (-1.62 Kcal/Mol), and Y343 (-4.74 Kcal/Mol) are the eight amino acids and their contribution.
